# Supplementary material for: Two Cycloartenol Synthases for Phytosterol Biosynthesis in Polygala tenuifolia Willd
Source: MDPI journal article supplement (doi:10.3390/ijms18112426), 2017-11-15
Supplement: s1 [file s1]

Supplemental Table S1. Accession data for the OSCs used in the phylogenetic analyses.

| Accession No. | Gene name | Function[Species]                                                                  |
|---------------|-----------|------------------------------------------------------------------------------------|
| At4g15340     | PEN1      | Arabidiol synthase [ <i>Arabidopsis thaliana</i> ]                                 |
| At4g15370     | PEN2      | Baruol synthase [ <i>A. thaliana</i> ]                                             |
| At5g36150     | PEN3      | Tirucalla-7,24-dien-3-ol synthase [ <i>A. thaliana</i> ]                           |
| At5g48010     | PEN4      | Thalianol synthase [ <i>A. thaliana</i> ]                                          |
| At5g42600     | PEN5      | Marneral synthase [ <i>A. thaliana</i> ]                                           |
| At1g78500     | PEN6      | Bauerenol synthase [ <i>A. thaliana</i> ]                                          |
| At1g78970     | LUP1      | Multifunctional triterpene synthase [ <i>A. thaliana</i> ]                         |
| At1g78960     | LUP2      | Multifunctional triterpene synthase [ <i>A. thaliana</i> ]                         |
| At1g78955     | LUP3      | Multifunctional triterpene synthase [ <i>A. thaliana</i> ]                         |
| At1g78950     | LUP4      | $\beta$ -amyrin synthase [ <i>A. thaliana</i> ]                                    |
| At1g66960     | LUP5      | Multifunctional triterpene synthase [ <i>A. thaliana</i> ]                         |
| At3g45130     | LSS1      | Lanosterol synthase [ <i>A. thaliana</i> ]                                         |
| At2g07050     | CAS1      | Cycloartenol synthase [ <i>A. thaliana</i> ]                                       |
| AB263204      | RsM2      | Multifunctional triterpene synthase [ <i>Rhizophora stylosa</i> ]                  |
| AB257507      | KcMS      | Multifunctional triterpene synthase [ <i>Kandelia candel</i> ]                     |
| AB289586      | BgLUS     | Lupeol synthase [ <i>Bruguiera gymnorhiza</i> ]                                    |
| FJ032006      | MdOSC1    | Multifunctional triterpene synthase [ <i>Malus <math>\times</math> domestica</i> ] |
| FJ032008      | MdOSC3    | Multifunctional triterpene synthase [ <i>Malus <math>\times</math> domestica</i> ] |
| KT383435      | MdOSC4    | Multifunctional triterpene synthase [ <i>Malus <math>\times</math> domestica</i> ] |
| KT383436      | MdOSC5    | Multifunctional triterpene synthase [ <i>Malus <math>\times</math> domestica</i> ] |
| AB058643      | LcIMS1    | Isomultiflorenol synthase [ <i>Luffa cylindrica</i> ]                              |
| FJ013228      | NsbAS     | $\beta$ -amyrin synthase [ <i>Nigella sativa</i> ]                                 |
| HM623869      | KdGLS     | Multifunctional triterpene synthase [ <i>Kanlanchoe daigremontiana</i> ]           |
| HM623870      | KdFRS     | Multifunctional triterpene synthase [ <i>K. daigremontiana</i> ]                   |
| HM623871      | KdLUS     | Multifunctional triterpene synthase [ <i>K. daigremontiana</i> ]                   |
| AB609123      | SHS1      | Shionone synthase [ <i>Aster tataricus</i> ]                                       |
| AY836006      | AsOXA1    | $\beta$ -amyrin synthase [ <i>Aster sedifolius</i> ]                               |
| FJ790411      | GsAS1     | $\beta$ -amyrin synthase [ <i>Gentiana straminea</i> ]                             |
| KJ467352      | GsAS2     | $\beta$ -amyrin synthase [ <i>G. straminea</i> ]                                   |
| AB037203      | GgbAS     | $\beta$ -amyrin synthase [ <i>Glycyrrhiza glabra</i> ]                             |
| AB181244      | LjAMY1    | $\beta$ -amyrin synthase [ <i>Lotus japonicus</i> ]                                |
| AF478455      | LjAMY2    | Multifunctional triterpene synthase [ <i>L. japonicus</i> ]                        |
| AJ430607      | MtAMY1    | $\beta$ -amyrin synthase [ <i>Medicago truncatula</i> ]                            |
| AB03802       | PSY       | $\beta$ -amyrin synthase [ <i>Pisum sativum</i> ]                                  |

|          |          |                                                                                   |
|----------|----------|-----------------------------------------------------------------------------------|
| EF107623 | PtBS     | $\beta$ -amyrin synthase [ <i>Polygala tenuifolia</i> ]                           |
| AB034803 | PSM      | Multifunctional triterpene synthase [ <i>Pisum sativum</i> ]                      |
| DQ915167 | SvBS     | $\beta$ -amyrin synthase [ <i>Saponaria vaccaria</i> ]                            |
| AB206469 | EtAS     | $\beta$ -amyrin synthase [ <i>Euphorbia tirucalli</i> ]                           |
| AB289585 | BgbAS    | $\beta$ -amyrin synthase [ <i>B. gymnorhiza</i> ]                                 |
| AB263203 | RsM1     | Multifunctional triterpene synthase [ <i>R. stylosa</i> ]                         |
| AB055512 | BPY      | $\beta$ -amyrin synthase [ <i>Betula platyphylla</i> ]                            |
| HM623868 | KdTAS    | Multifunctional triterpene synthase [ <i>K. daigremontiana</i> ]                  |
| AB009030 | PNY1     | $\beta$ -amyrin synthase [ <i>Panax ginseng</i> ]                                 |
| HM219225 | AeAS     | $\beta$ -amyrin synthase [ <i>Aralia elata</i> ]                                  |
| HQ266579 | SITTS1   | $\beta$ -amyrin synthase [ <i>Solanum lycopersicum</i> ]                          |
| HQ266580 | SITTS2   | Multifunctional triterpene synthase [ <i>S. lycopersicum</i> ]                    |
| AB265170 | PNA      | Dammarenediol-II synthase [ <i>P. ginseng</i> ]                                   |
| JN991165 | CrAS     | Multifunctional triterpene synthase [ <i>Catharanthus roseus</i> ]                |
| AB009029 | PNX      | Cycloartenol synthase [ <i>P. ginseng</i> ]                                       |
| AB055510 | BPX      | Cycloartenol synthase [ <i>B. platyphylla</i> ]                                   |
| AB025968 | GgCAS1   | Cycloartenol synthase [ <i>G. glabra</i> ]                                        |
| D89619   | PSX      | Cycloartenol synthase [ <i>P. sativum</i> ]                                       |
| HM623872 | KdCAS    | Cycloartenol synthase [ <i>K. daigremontiana</i> ]                                |
| AK121211 | AK121211 | Cycloartenol synthase [ <i>O. sativa</i> ]                                        |
| AK070534 | AK070534 | Unnamed protein [ <i>O. sativa</i> ]                                              |
| AB116238 | CPQ      | Cucurbitadienol synthase [ <i>Cucurbita pepo</i> ]                                |
| HQ128567 | SgCbQ    | Cucurbitadienol synthase [ <i>Siraitia grosvenorii</i> ]                          |
| AB009031 | PNZ      | Lanosterol synthase [ <i>P. ginseng</i> ]                                         |
| AK066327 | AK066327 | Pakeol synthase [ <i>O. sativa</i> ]                                              |
| AB025343 | QEW      | Lupeol synthase [ <i>Olea europaea</i> ]                                          |
| AB025345 | TRW      | Lupeol synthase [ <i>T. officinale</i> ]                                          |
| AB055511 | BPW      | Lupeol synthase [ <i>B. platyphylla</i> ]                                         |
| KX147270 | MiFRS    | Friedelin synthase [ <i>Maytenus ilicifolia</i> ]                                 |
| KX147271 | MiCAS1   | Cycloartenol synthase [ <i>M. ilicifolia</i> ]                                    |
| KM111167 | IaAS1    | Multifunctional triterpene synthase [ <i>Ilex asprella</i> var. <i>asprella</i> ] |
| KM111168 | IaAS2    | Multifunctional triterpene synthase [ <i>I. asprella</i> var. <i>asprella</i> ]   |
| JQ728553 | WsOSCBS  | $\beta$ -amyrin synthase [ <i>Withania somnifera</i> ]                            |
| JQ728552 | WsOSCLS  | Lupeol synthase [ <i>W. somnifera</i> ]                                           |
| HM037907 | WsOSCCS  | Cycloartenol synthase [ <i>W. somnifera</i> ]                                     |

Supplemental Table S2. Oligonucleotide primers used in this study

|         | Primers  | Sequence (5' to 3')        |
|---------|----------|----------------------------|
| Cloning | PtCAS1-F | TCATGTGGAGGCTGAAGATCGCAAAC |
|         | PtCAS1-R | TTAGCATGCCTGCAATACACGAGTA  |
|         | PtCAS2-F | TCATGTGGAAACTTAAGATCGGAGCA |
|         | PtCAS2-R | TTAAAGCGAGTGTAACACTTTCGAT  |
| qRT-PCR | PtCAS1-F | ATACCGTACTCGTGTATTGCAG     |
|         | PtCAS1-R | CAGTAACAGTTGACAAGGCGA      |
|         | PtCAS2-F | CCAATATGGGCATTGGGTGAA      |
|         | PtCAS2-R | ATGTCAAACGACAACATCCCAA     |
|         | Actin-F  | GATGACATGGAAAAGATTTGGCATC  |
|         | Actin-R  | AAGGATGGCATGAGGGAGGGCGTAA  |
